# Supplementary material for: Tuning the dimensionality in chiral and racemic organic/tin hybrids with halides
Source: Royal Society of Chemistry journal article supplement (doi:10.1039/d4dt01645a), 2024-01-01
Supplement: d4dt01645a1.pdf [file d4dt01645a1.pdf]

# **Tuning the dimensionality in chiral and racemic organic/inorganic hybrid Tin halide Compounds**

**Louis Caussin, Abdelaziz Jouaiti, Daniel Chartrand, W. G. Skene,  
Sylvie Ferlay**

## Supplementary Information

|                   | $((R)\text{-EBA})_2\text{-SnBr}_6$                                                                                                                                                  | $((S)\text{-EBA})_2\text{-SnBr}_6$                                                                                                                                                  | $(rac\text{-EBA})_2\text{-SnBr}_6$                                                | $(S)\text{-EBA-SnI}_3$                                             | $(R)\text{-EBA-SnI}_3$                                        | $rac\text{-EBA-SnI}_3$                                          |
|-------------------|-------------------------------------------------------------------------------------------------------------------------------------------------------------------------------------|-------------------------------------------------------------------------------------------------------------------------------------------------------------------------------------|-----------------------------------------------------------------------------------|--------------------------------------------------------------------|---------------------------------------------------------------|-----------------------------------------------------------------|
| $d_{\text{Sn-X}}$ | 2.5794(6)<br>2.5795(6)<br>2.5815(6)<br>2.5924(7)<br>2.6119(6)<br>2.6244(6)                                                                                                          | 2.5808(12)<br>2.5802(11)<br>2.5836(12)<br>2.5926(12)<br>2.6099(11)<br>2.6222(11)                                                                                                    | 2.5908(6)<br>2.5999(6)<br>2.6006(7)                                               | 2.9434(10)<br>2.9576(10)<br>3.1024(10)                             | 2.9439(6)<br>2.9607(7)<br>3.1042(7)                           | 2.9804(10)<br>3.0414(6)                                         |
| X-Sn-X            | 87.46(2)<br>88.21(2)<br>88.41(2)<br>89.24(2)<br>89.33(2)<br>90.30(2)<br>90.37(2)<br>90.43(2)<br>90.50(2)<br>90.97(2)<br>91.91(2)<br>92.96(2)<br>176.60(3)<br>177.42(2)<br>178.40(3) | 87.45(4)<br>88.28(4)<br>88.58(4)<br>89.23(4)<br>89.42(4)<br>90.24(4)<br>90.27(4)<br>90.44(4)<br>90.56(4)<br>90.96(4)<br>91.78(4)<br>92.88(4)<br>176.84(5)<br>177.52(5)<br>178.41(5) | 91.43(2)<br>88.57(2)<br>89.37(2)<br>89.75(2)<br>90.63(2)<br>90.25(2)<br>180.00(3) | 88.67(3)<br>91.29(3)<br>94.28(3)                                   | 88.663(18)<br>91.321(18)<br>94.362(18)                        | 86.58(2)<br>93.94(2)<br>94.11(3)                                |
| $d_{\text{N-X}}$  | 3.4128 (4)<br>3.4198 (4)<br>3.4413(4)<br>3.4718(4)<br>3.4986 (5)<br>3.5432 (5)<br>3.5591 (5)<br>3.6875(4)<br>3.7629(5)                                                              | 3.4134(9)<br>3.4301(8)<br>3.4520(8)<br>3.4799(8)<br>3.5002(9)<br>3.5139(8)<br>3.5495(8)<br>3.5652(9)<br>3.6770(7)<br>3.7599 (9)                                                     | 3.3985(6)<br>3.4243(6)<br>3.4324(6)<br>3.5646(5)<br>3.6519(6)                     | 3.6340(11)<br>3.6893(11)<br>3.7721(10)<br>3.7827(10)<br>3.8000(10) | 3.6259(7)<br>3.6923(7)<br>3.7712(7)<br>3.7825(8)<br>3.7894(7) | 3.5180(11)<br>3.5775(9)<br>3.8142(9)<br>3.8420(11)<br>3.8965(9) |
| $d_{\text{C-X}}$  | 3.6231(6)<br>3.6663(5)<br>3.7233 (6)                                                                                                                                                | 3.6141(12)<br>3.6720(10)<br>3.7197 (10)                                                                                                                                             | 3.5845(6)<br>3.7151(6)                                                            | 3.8783(13)<br>3.9476(11)                                           | 3.8599(9)<br>3.9526(8)                                        | 3.6158(14)<br>3.8647(14)<br>3.9282(17)                          |

**Table S1.** Main distances (standard deviation in parentheses) measured for  $((S)\text{-EBA})_2\text{-SnBr}_6$ ,  $((R)\text{-EBA})_2\text{-SnBr}_6$ ,  $(rac\text{-EBA})_2\text{-SnBr}_6$ ,  $(S)\text{-EBA-SnI}_3$ ,  $(R)\text{-EBA-SnI}_3$  and  $rac\text{-EBA-SnI}_3$ .

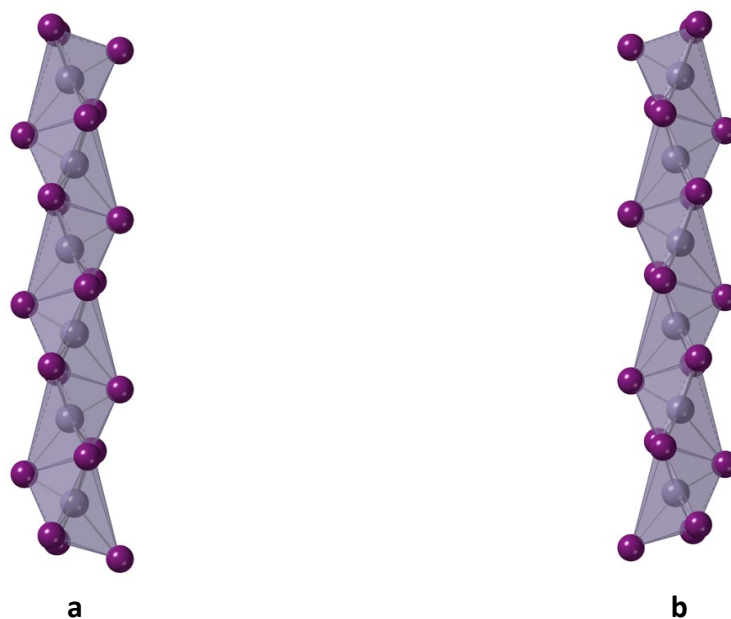

**Figure S1:** Representation of the inorganic  $(\text{SnI}_3)_n$  chains for  $(S)$  (a)- or  $(R)\text{-EBA-SnI}_3$  (b) ; the chains are mirror images.

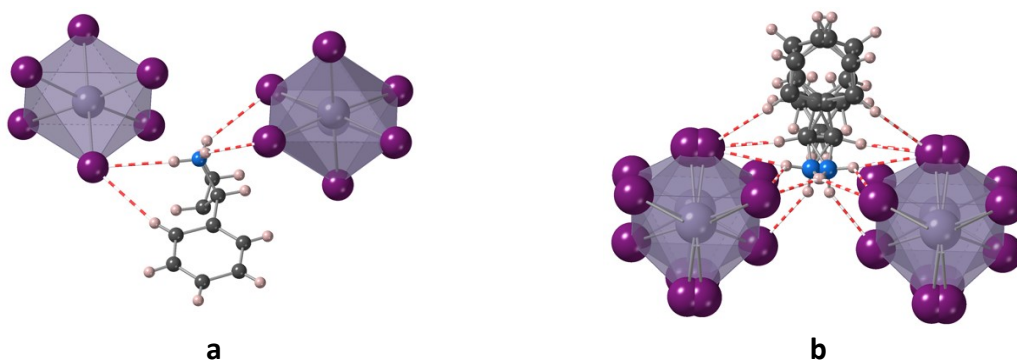

**Figure S2:** Representation of the structures and short contacts in (a) (*S*)- or (*R*)-**EBA**-SnI<sub>3</sub> and (b) (*rac*)-**EBA**-SnI<sub>3</sub>.

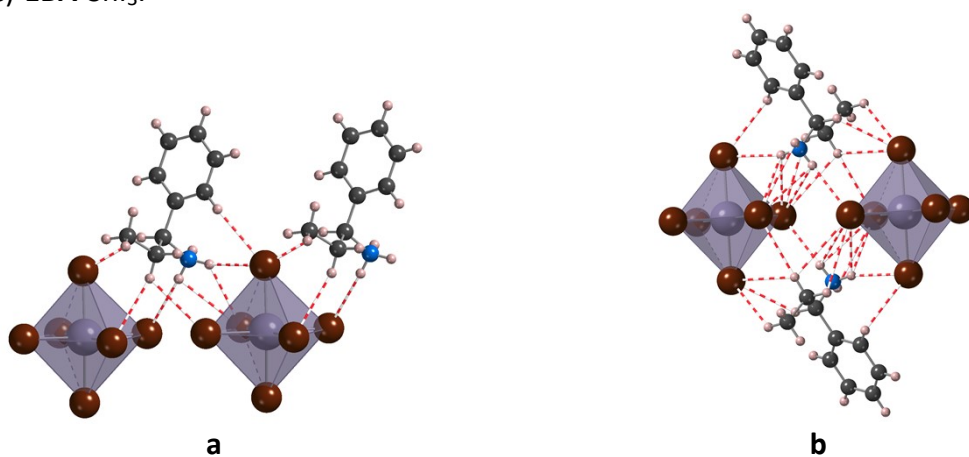

**Figure S3:** Representation of the structures and short contacts in (a) ((*S*)- or (*R*)- **EBA**)<sub>2</sub>-SnBr<sub>6</sub> and (b) ((*rac*)- **EBA**)<sub>2</sub>-SnBr<sub>6</sub>.

## SHAPE program analysis<sup>1</sup>

Deviation considering 6-coordinated Sn  
(CShM, Continuous Shape Measures)

|                        | $((R)\text{-EBA})_2\text{-SnBr}_6$ | $((S)\text{-EBA})_2\text{-SnBr}_6$ | $(rac)\text{-EBA})_2\text{-SnBr}_6$ | $(S)\text{-EBA-SnI}_3$ | $(R)\text{-EBA-SnI}_3$ | $rac\text{-EBA-SnI}_3$ |
|------------------------|------------------------------------|------------------------------------|-------------------------------------|------------------------|------------------------|------------------------|
| Deviation from Oh CShM | 19.056                             | 19.046                             | 19.324                              | 17.124                 | 17.127                 | Too much disorder      |

## XRPD measurements

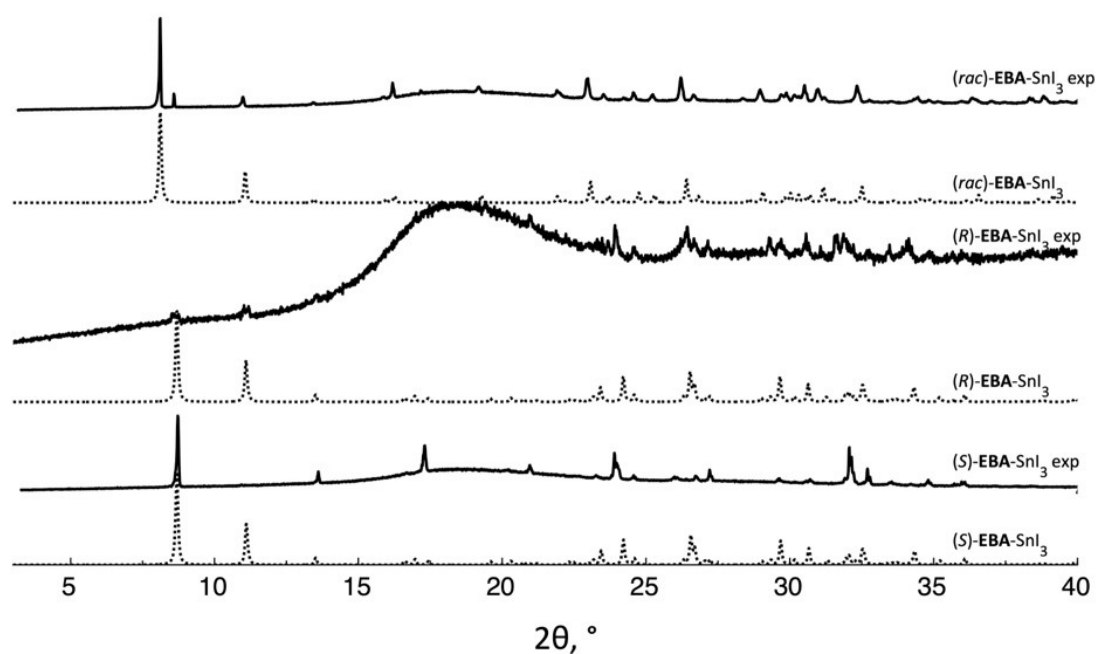

**Figure S4:** (S)- or (R)-EBA-SnI<sub>3</sub> and (rac)-EBA-SnI<sub>3</sub>, comparison of the simulated and experimental powder X-Ray diffraction studies (PXRD) diagrams.

a

1 a) M. Llunell, D. Casanova, J. Girera, P. Alemany, S. Alvarez, SHAPE, version 2.1, Universitat de Barcelona, Barcelona, Spain ; b) S. Alvarez, P. Alemany, D. Casanova, J. Cirera, M. Llunell, D. Avnir, Shape maps and polyhedral interconversion paths in transition metal chemistry, *Coord. Chem. Rev.*, 2005, **249**, 1693-1708.

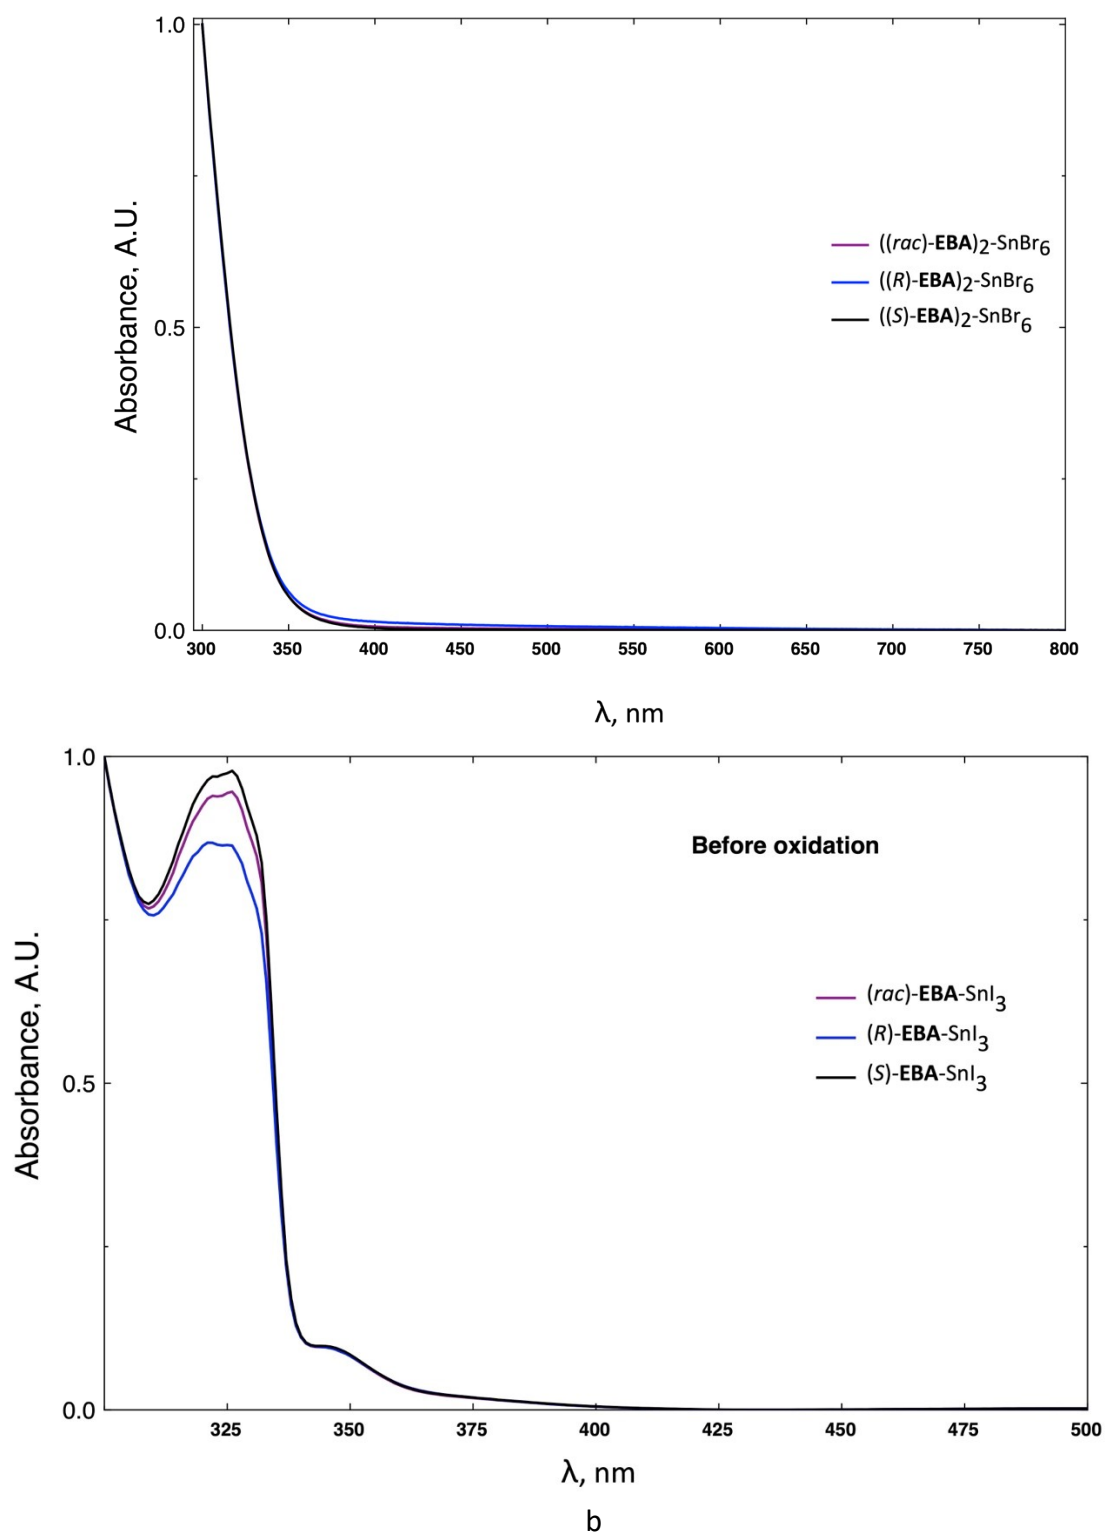

**Figure S5:** UV-vis spectra in a DMF solution of chiral antimony halide compounds (a) 0D  $((S)\text{-}$  or  $(R)\text{-EBA})_2\text{-SnBr}_6$  and  $((rac)\text{-EBA})_2\text{-SnBr}_6$  series and (b) 1D series. (b)  $(S)\text{-}$  or  $(R)\text{-EBA-SnI}_3$  and  $(rac)\text{-EBA-SnI}_3$ .

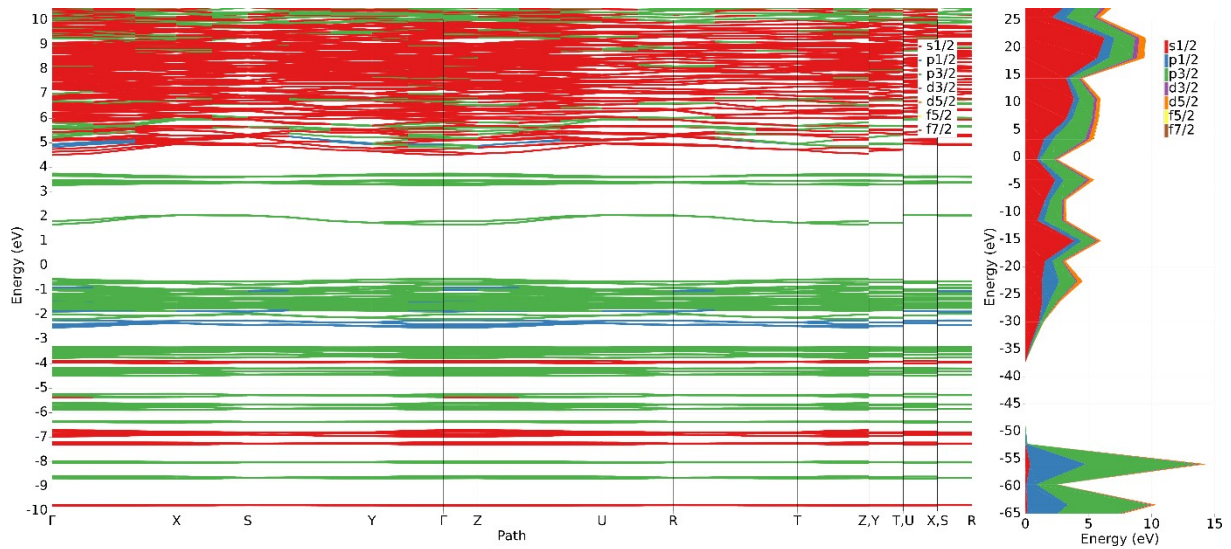

**Figure S6:** Computed electronic band structures (left) and density of states (right) for (rac-EBA)<sub>2</sub>-SnBr<sub>6</sub>.

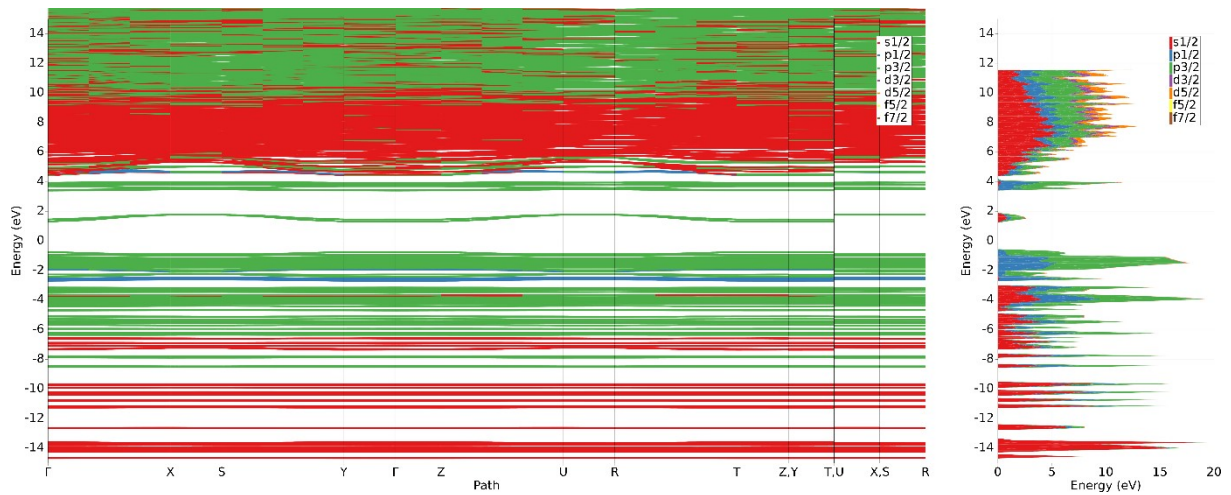

**Figure S7:** Computed electronic band structures (left) and density of states (right) for (S-EBA)<sub>2</sub>-SnBr<sub>6</sub>.

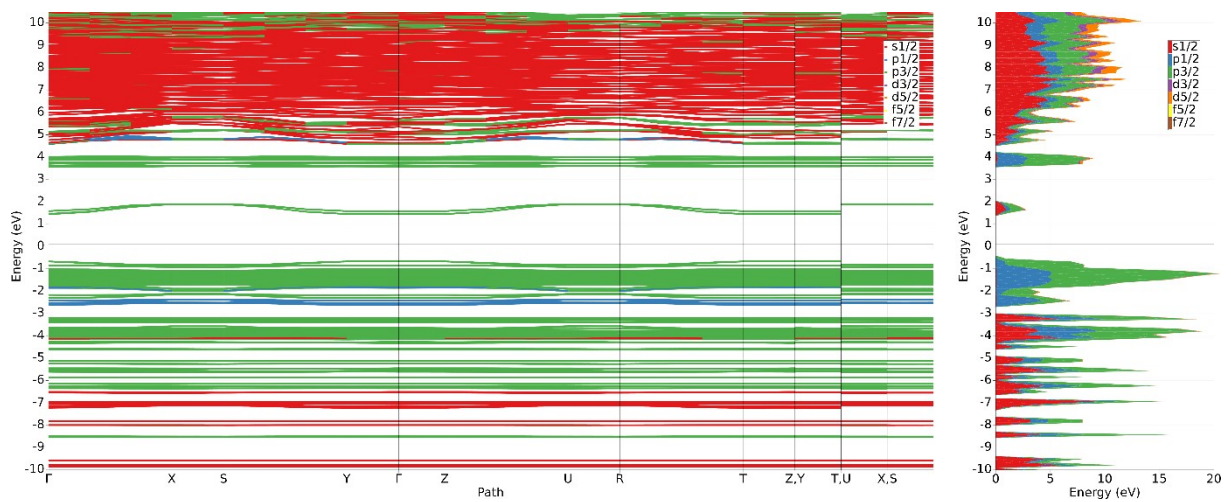

**Figure S8:** Computed electronic band structures (left) and density of states (right) for (R-EBA)<sub>2</sub>-SnBr<sub>6</sub>.

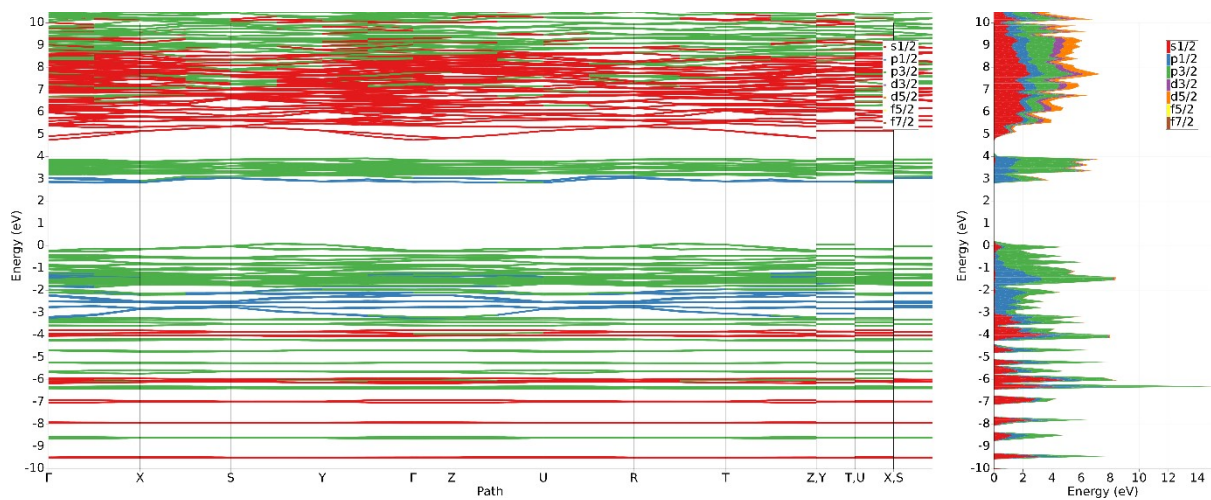

**Figure S9:** Computed electronic band structures (left) and density of states (right) for (S-EBA)-SnI<sub>3</sub>.

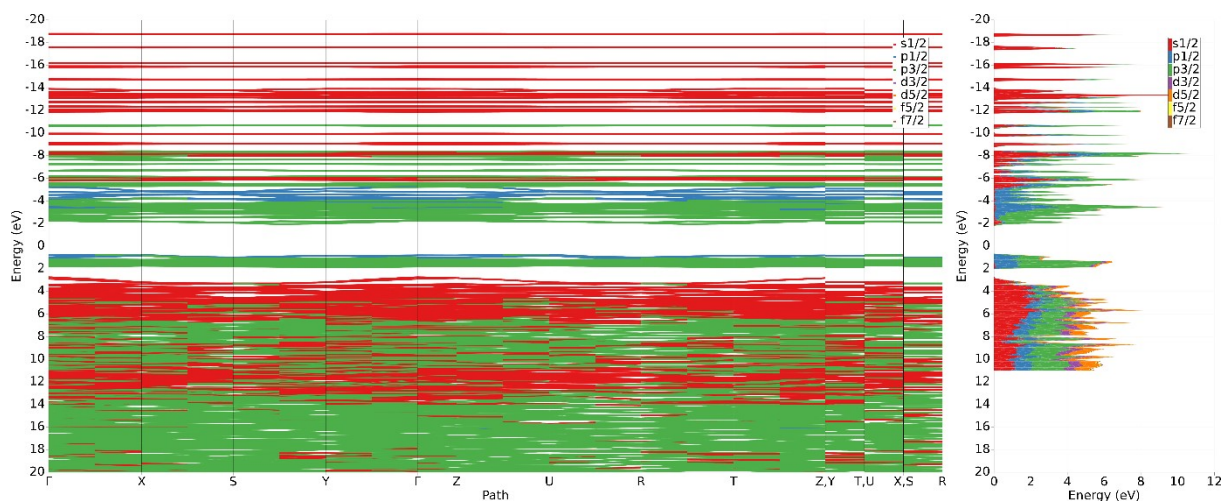

**Figure S10:** Computed electronic band structures (left) and density of states (right) for (R-eba)-SnI<sub>3</sub>.
